# Supplementary material for: The Impact of Cardiac Comorbidity Sequence at Baseline and Mortality Risk in Type 2 Diabetes Mellitus: A Retrospective Population-Based Cohort Study
Source: MDPI journal article supplement (doi:10.3390/life12121956), 2022-11-22

**Supplementary Table S1.** ICD-9 Codes of the comorbidities.

| Comorbidities                                 | ICD Code                                                                                    |
|-----------------------------------------------|---------------------------------------------------------------------------------------------|
| Ophthalmological Diabetic Complications       | 250.5                                                                                       |
| Renal Diabetic Complications                  | 250.4                                                                                       |
| Neurological Diabetic Complications           | 250.6                                                                                       |
| Peripheral Vascular Disease                   | 250.7                                                                                       |
| Ischemic Stroke and Transient Ischemic Attack | 433.01, 433.11, 433.21, 433.31, 433.81, 433.91, 434.01, 434.91, 436, 435                    |
| Intracranial Hemorrhage                       | 430.00, 431.00, 432.00, 432.10, 432.90, 852.00-852.09, 852.20-852.29, 852.40-852.49, 853.00 |
| Atrial Fibrillation                           | 427.31, 429.4                                                                               |
| Heart Failure                                 | 428.00-428.99                                                                               |
| Coronary Heart Disease                        | 410.00-411.99, 413.00-414.99                                                                |
| Osteoporosis                                  | 733.00                                                                                      |
| Dementia                                      | 290.00-290.99, 331.00, 294.10-294.29, 331.19                                                |
| Chronic Obstructive Pulmonary Disease         | 490.00-496.99                                                                               |
| Hypertension                                  | 491.00-492.99                                                                               |
| Cancer                                        | 140.00-209.99                                                                               |

**Supplementary Figure S1.** Kaplan-Meier Survival Analysis on the effects of atrial fibrillation, coronary heart disease, and heart failure on mortality

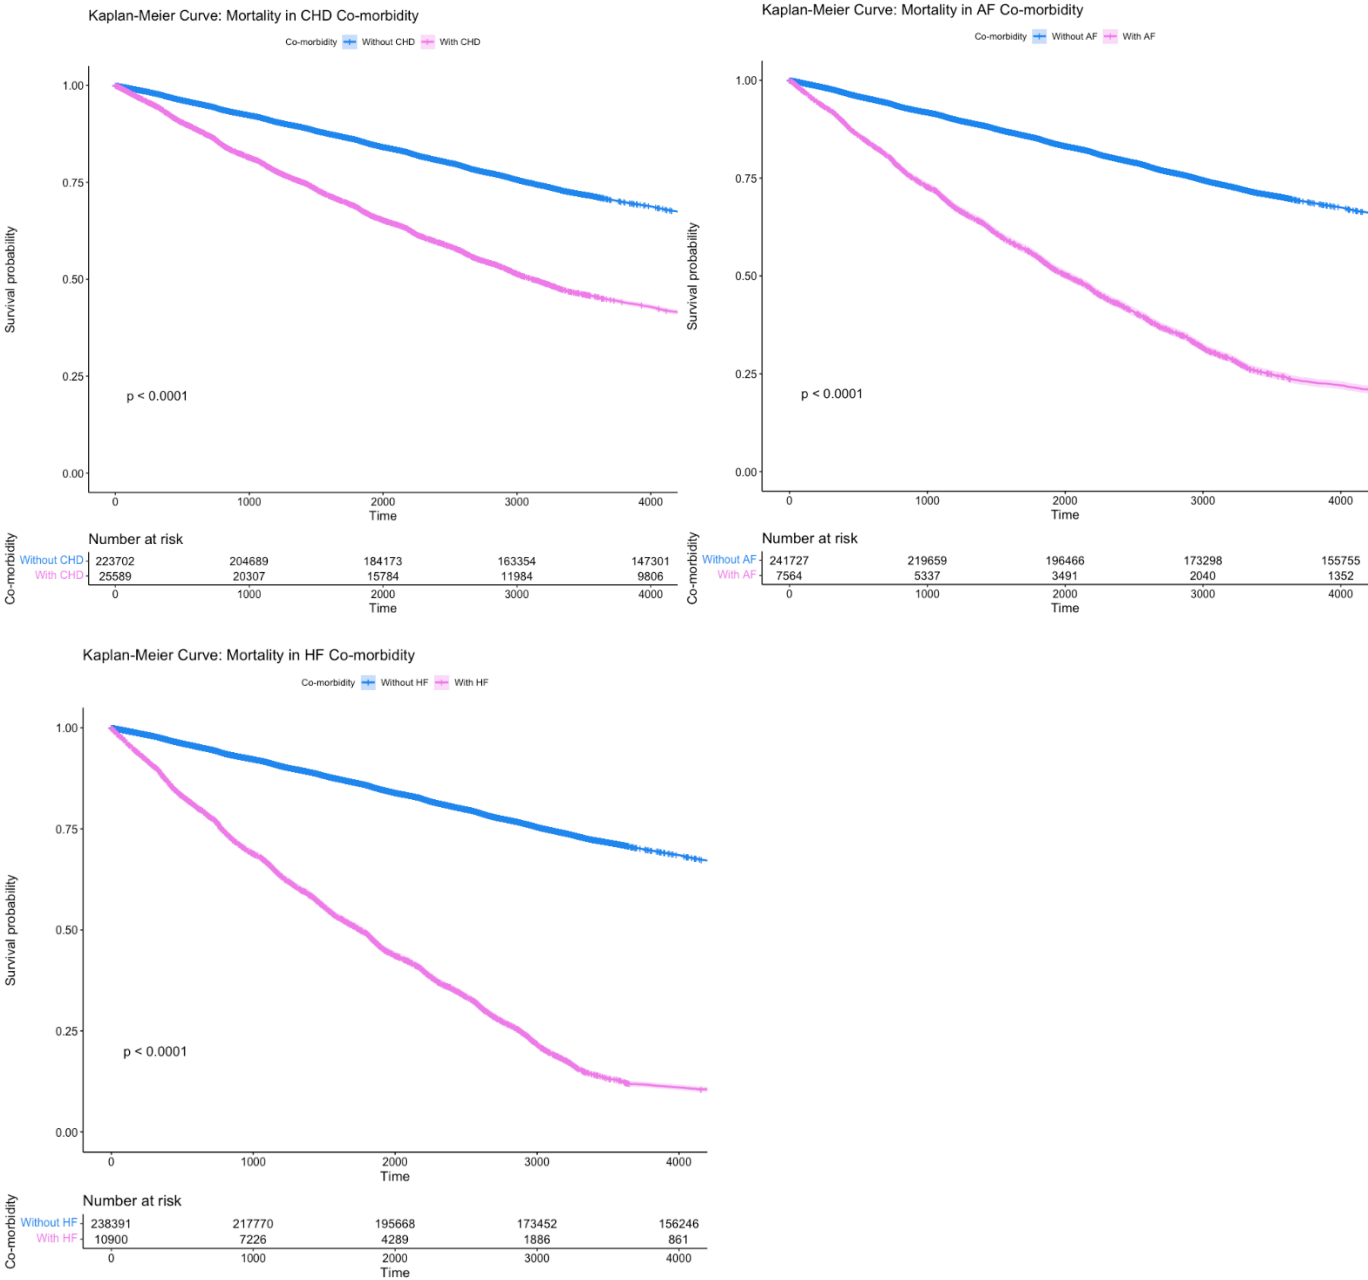

**Supplementary Figure S2.** Kaplan-Meier survival plot for survival in days in sub-groups divided by sequential complications of heart failure, coronary artery disease, and atrial fibrillation.

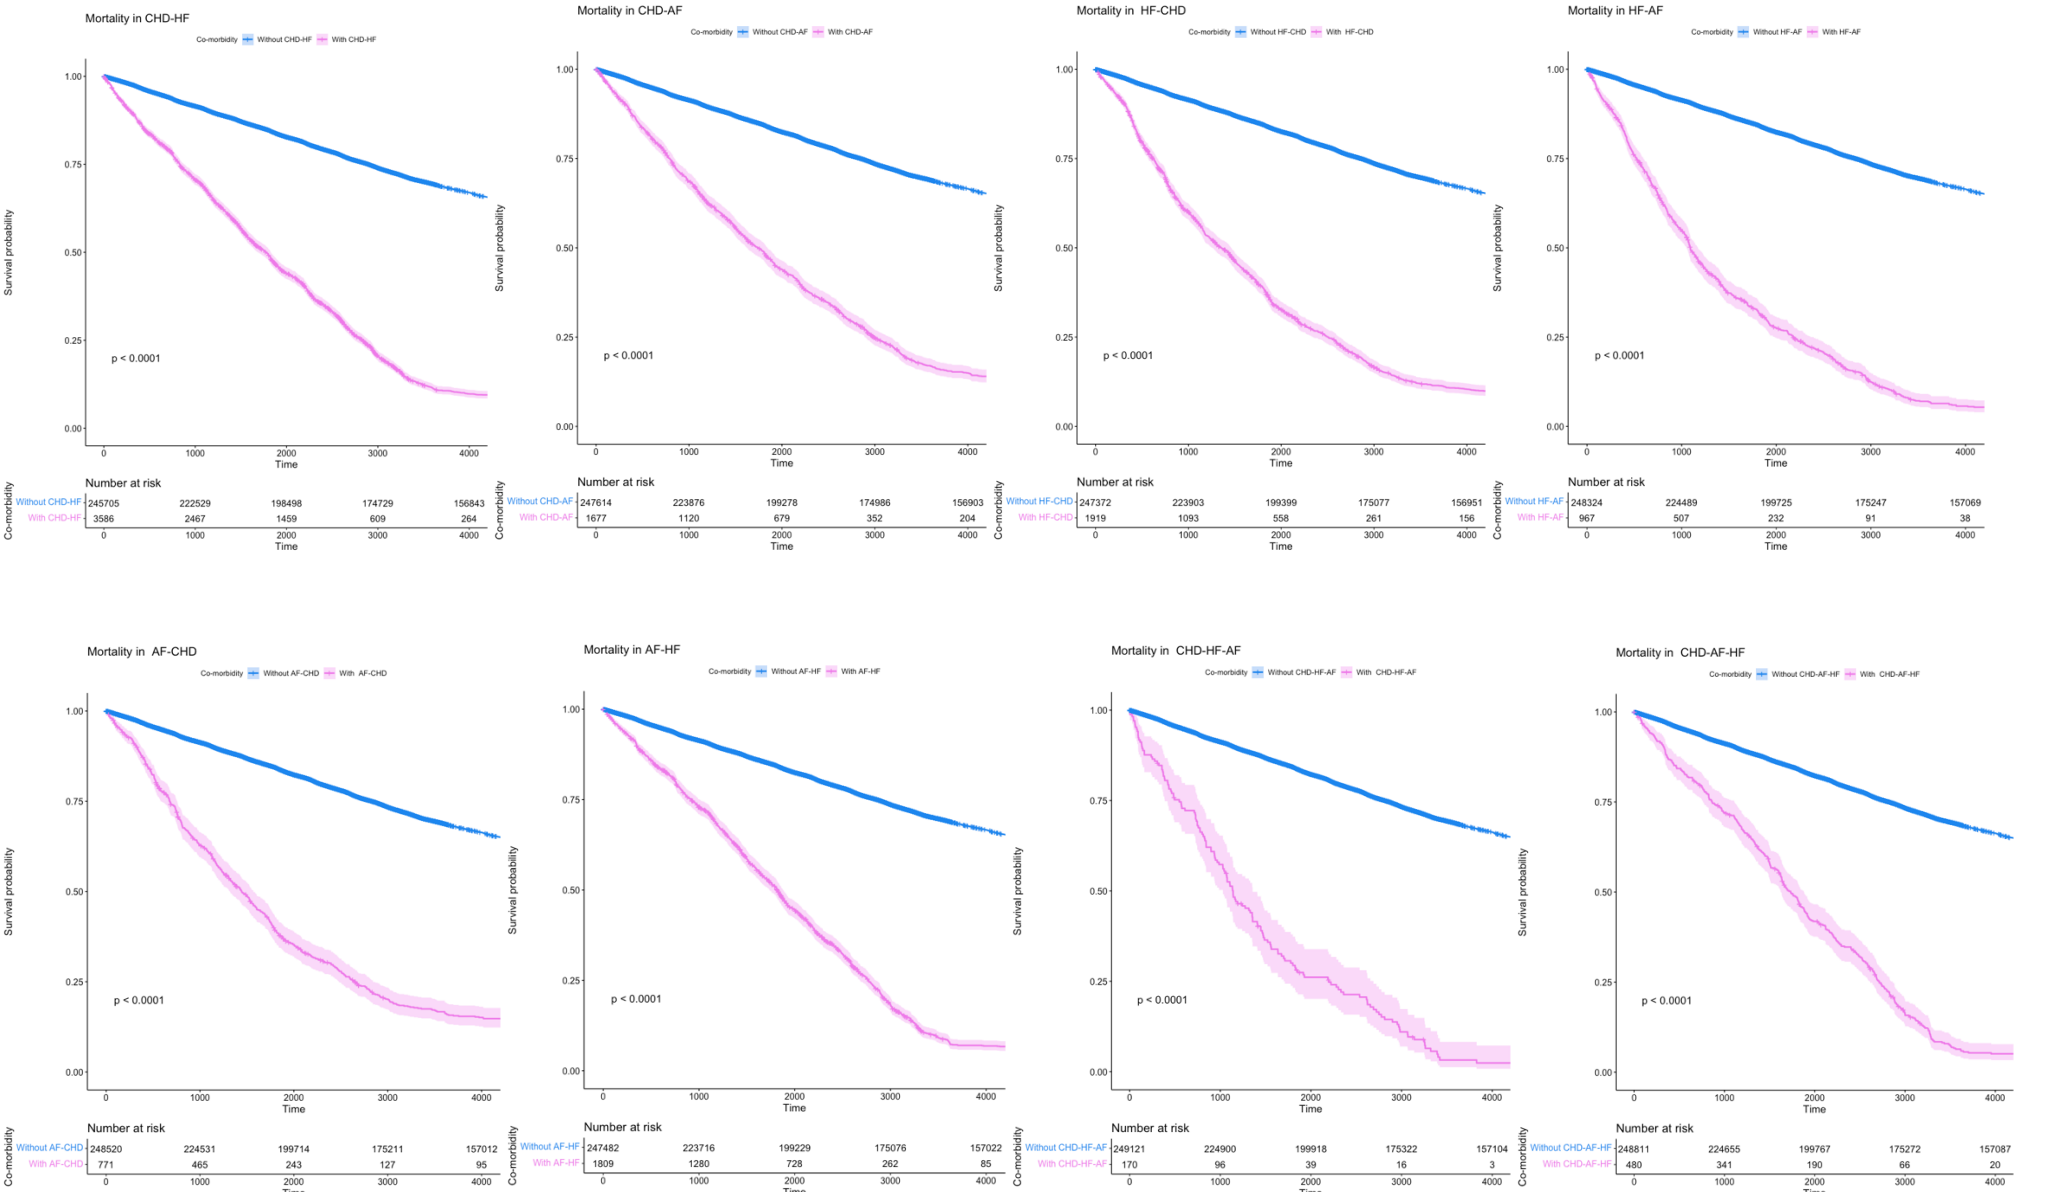

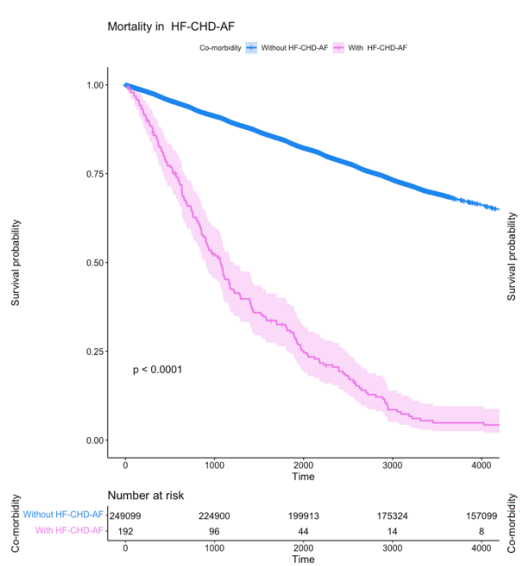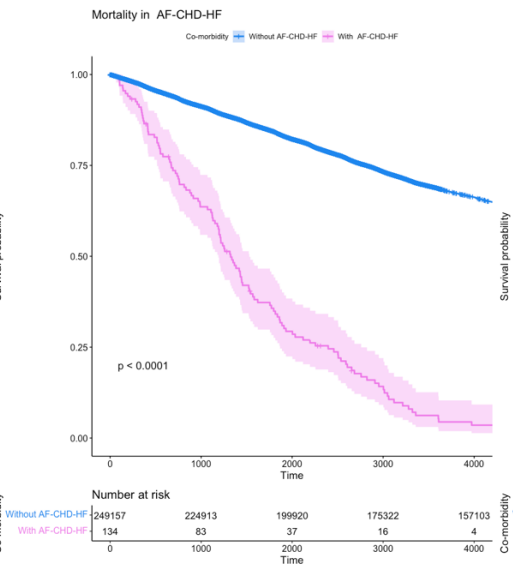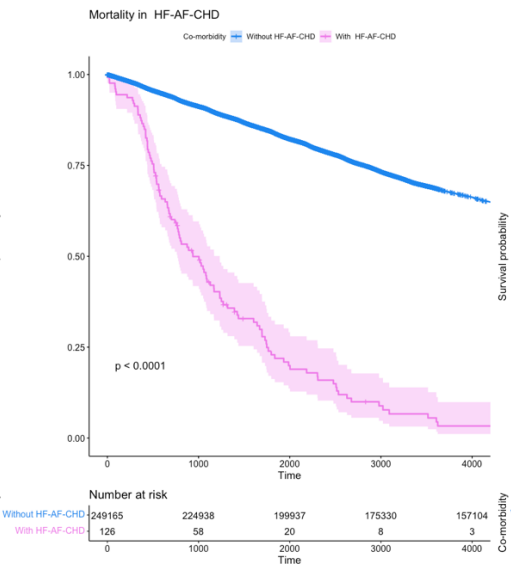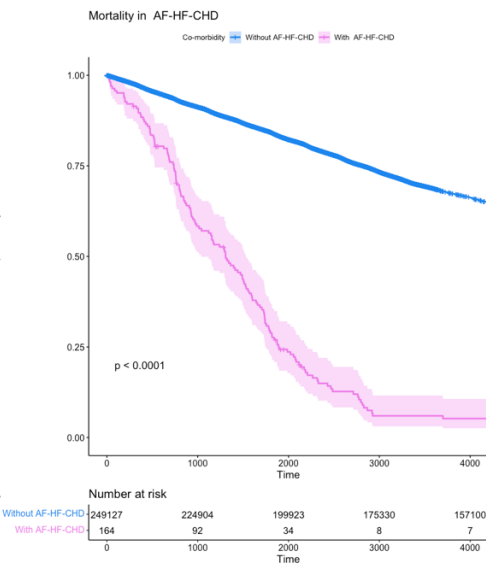

Supplement: s1 [file s1]
